# Supplementary material
Source: ML conference proceedings conference paper supplement (https://www.ecva.net/papers/eccv_2024/papers_ECCV/html/796_ECCV_2024_paper.php)
Supplement: Supplementary file 1 [file 00796-supp.pdf]

# Textual-Visual Logic Challenge: Understanding and Reasoning in Text-to-Image Generation

## Appendix

Peixi Xiong<sup>1</sup>, Michael Kozuch<sup>1</sup>, and Nilesch Jain<sup>1</sup>

Intel Labs, USA

{peixi.xiong, michael.a.kozuch, nilesch.jain}@intel.com

## 1 Dataset Overview

### 1.1 Dataset Specifications

#### Ground Truth Image

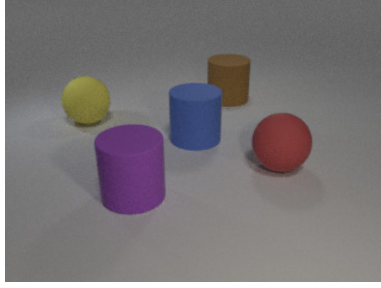

#### Text Prompts

Add a **blue cylinder** at the center . Add a **red sphere** in front of **it** on the right . Add a **purple cylinder** in front of **it** on the left and in front of **blue cylinder** on the left . Add a **brown cylinder** behind **it** on the right and behind **red sphere** on the left and behind **blue cylinder** on the right . Add a **yellow sphere** in front of **it** on the left and behind **purple cylinder** on the left and behind **red sphere** on the left and behind **blue cylinder** on the left .

#### Scene Graph

```
{
  "image_index": 9,
  "image_filename": "TVLOGIC_detail_000009.png",
  "split": "detail",
  "objects": [
    {
      "rotation": 322.6178642312034,
      "shape": "cylinder",
      "color": "blue",
      "3d_coords": [0.0, 0.0, 0.6999999988079071],
      "pixel_coords": [160, 101, 11.217621803283691],
      "size": "large",
      "material": "rubber"
    },
    ...
  ],
  "relationships": {
    "front": [[1, 2], [2, []], [0, 1, 2, 4], [0, 1, 2]],
    "behind": [[3, 4], [0, 3, 4], [0, 1, 3, 4], [], [3]],
    "left": [[2, 4], [0, 2, 3, 4], [4], [0, 2, 4], []],
    "right": [[1, 3], [], [0, 1, 3], [1], [0, 1, 2, 3]]
  },
  "directions": {
    "below": [-0.0, -0.0, -1.0],
    "left": [-0.6563112735748291, -0.7544902563095093, 0.0],
    "above": [0.0, 0.0, 1.0],
    "front": [0.754490315914154, -0.6563112735748291, -0.0],
    "behind": [-0.754490315914154, 0.6563112735748291, 0.0],
    "right": [0.6563112735748291, 0.7544902563095093, -0.0]
  },
  "manipulation": None
}
```

**Fig. 1:** Overview of Our Annotated Dataset. For each text prompt, the dataset includes the corresponding ground truth image and a detailed scene graph. This graph serves as an enhanced reference by indicating the spatial location of each entity and mapping out their interrelations. It is important to note that the scene graph is not employed in either the training or evaluation phases of any experiments.

Figure 1 illustrates the format of the scene graph attached to our dataset annotations. The graph encompasses essential information, including the file

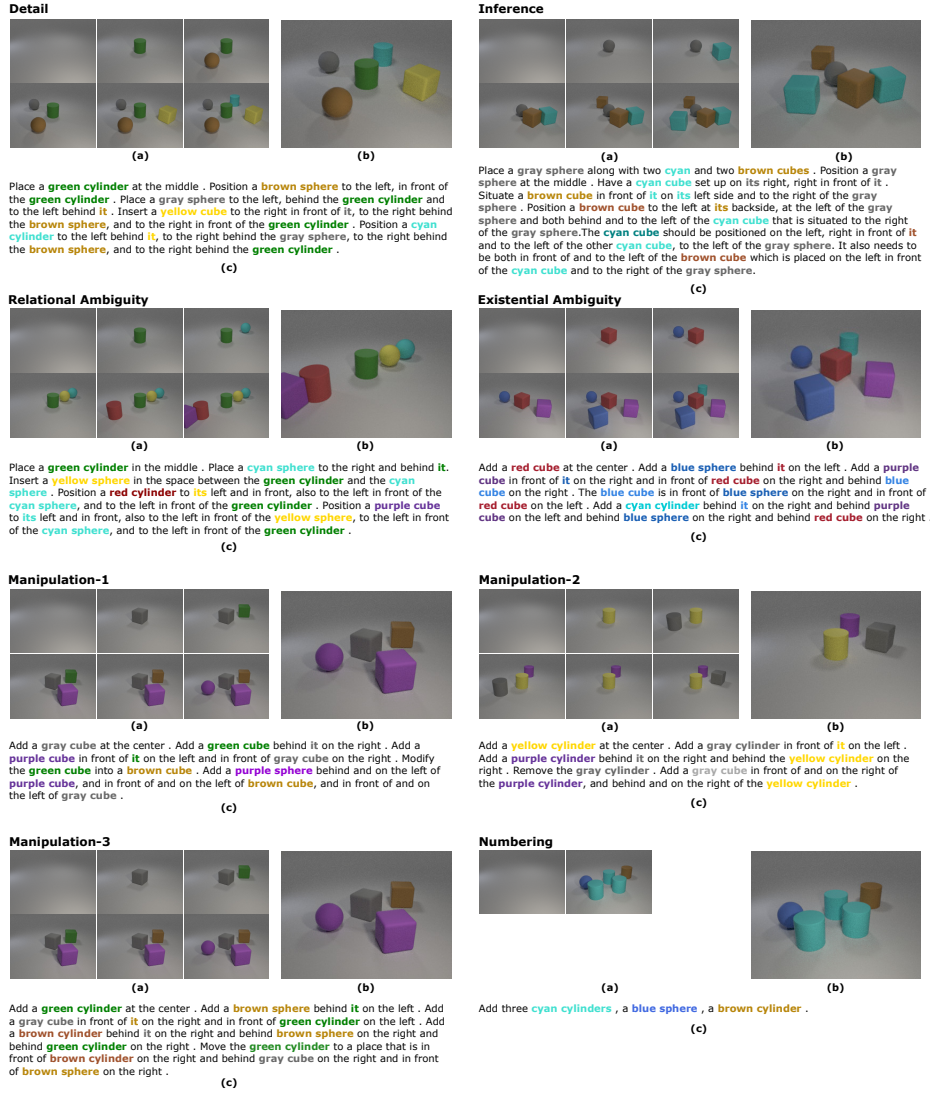

**Fig. 2:** Overview of Our Dataset. For each text prompt, in addition to the final ground truth image, we also attach a sequence of intermediate results to offer better reference points across certain categories. These sequences of images are not employed in either the training or evaluation processes.

index and name, detailed descriptions of the entities, and their interrelations. For each entity, attributes such as shape, color, size, and material are specified, along with spatial details like coordinates and rotation angles. Relationships between entities are articulated based on their relative positions in 3D space and are categorized by the type of relation. Additionally, to aid in the interpretation of

spatial orientations—left, up, and behind within the scene—reference directions are provided. This structured approach to annotation ensures a comprehensive and precise representation of the scene, facilitating an improved understanding and analysis for our Textual-Visual Logic challenge.

As indicated in Figure 2, the dataset includes not only the final ground truth images for each text prompt but also features a sequence of images associated with each annotation. This incorporation of intermediate results provides a valuable reference for further analysis, especially for tasks related to visual reasoning.

## 1.2 Generation Methodology

Figure 3 illustrates the dataset generation process, highlighting the creation of scene images through Blender [2] under predefined illumination conditions and camera directions, with added minor randomness to illumination for enhanced generalizability. In this dataset, each object—restricted to one of three shapes (cube, sphere, cylinder) and one of eight colors—maintains a consistent material and size. The initial image in each sequence positions the object at the image center, while subsequent images feature objects in random, yet visible and non-overlapping positions. Both the final image and the entire sequence are included in our dataset to provide comprehensive references.

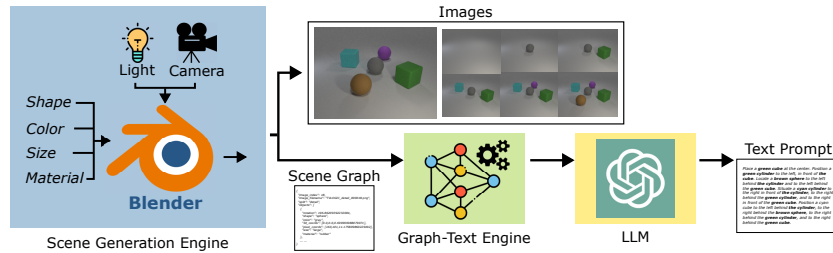

**Fig. 3:** Overview of the Annotation Generation Process: Blender and ChatGPT-4 are utilized in this process.

Annotations come with a scene graph delineating the relationships and positions of objects relative to the image center, structured through directed edges that represent left-right and front-back spatial relationships. To generate initial instructions, we employ a graph-text engine using simple text templates, such as "Add a [object color] [object shape] [relative position: depth] on the [relative position: horizontal]." To increase variation in natural language, we utilize a Large Language Model, specifically ChatGPT-4 [4], to refine these instructions. For the refined prompt proposals, a human audit is conducted to filter out prompts that are mismatched in meaning, lack diversity in natural language, or contain other inaccuracies. The resulting text prompts, enriched with natural language diversity, are then incorporated into the dataset.

## 2 Experiment Settings and Details

### 2.1 Training Details and Evaluation Metrics

In our proposed model, a multi-head attention block comprising 8 heads is employed for co-attention learning, with parameters  $m$  and  $n$  within the multi-modality fusion module set to 2 and 3, respectively. This configuration is based on the optimal outcomes derived from a series of tests. Relation tokens are generated using the dependency parser and POS tags from NLTK [1]. The learning rate for the Adam optimizer is established at  $10^{-4}$ , with beta values set to (0.9, 0.999). Our model undergoes distributed training across 4 NVIDIA A100 GPUs.

The loss for the discriminator is defined as:

$$\mathcal{L}_{\mathcal{D}} = \mathcal{L}_{uNet}^D + \frac{1}{2}(\mathcal{L}_{info-G}^D + \mathcal{L}_{txt-G}^D) \quad (1)$$

Each term in the equation is defined as:

$$\begin{aligned} \mathcal{L}_{uNet}^D &= -\mathbb{E}[\min(0, -1 + \mathbf{d}_{uNet}^{real})] \\ &\quad - \mathbb{E}[\min(0, -1 - \mathbf{d}_{uNet}^{fake})], \\ \mathcal{L}_{info-G}^D &= \mathbb{E}[d_{info-G}], \\ \mathcal{L}_{txt-G}^D &= -\mathbb{E}[\min(0, -1 + d_{txt-G}^{real})] \\ &\quad - \mathbb{E}[\min(0, -1 - d_{txt-G}^{fake})] \\ &\quad - \mathbb{E}[\min(0, -1 - d_{txt-G}^{unpair})], \end{aligned} \quad (2)$$

The loss for the generator is defined as:

$$\mathcal{L}_G = \mathcal{L}_{uNet}^G + \mathcal{L}_{txt-G}^G \quad (3)$$

Each term related to the generator loss is defined as:

$$\begin{aligned} \mathcal{L}_{uNet}^G &= -\mathbb{E}[\mathbf{d}_{uNet}^{fake}], \\ \mathcal{L}_{txt-G}^G &= -\mathbb{E}[d_{txt-G}^{fake}] \end{aligned} \quad (4)$$

To address concerns regarding the object detector’s performance as an evaluation metric, we complement it with reference metrics—namely, Average Precision (AP), Average Recall (AR), and F1 scores for the fully annotated image. These reference metrics are derived from a subset of the test split, based on detection results and their corresponding annotated scene graphs, yielding an AP of 0.98428, an AR of 0.97463, and an F1 score of 0.9794.

### 2.2 Experiment Settings

Figure 4 illustrates one of our experimental setups, where ChatGPT4 [4] and Blender [2] are utilized together to translate text prompts into visual 3D scenes. Initially, ChatGPT processes the prompts, converting the textual descriptions

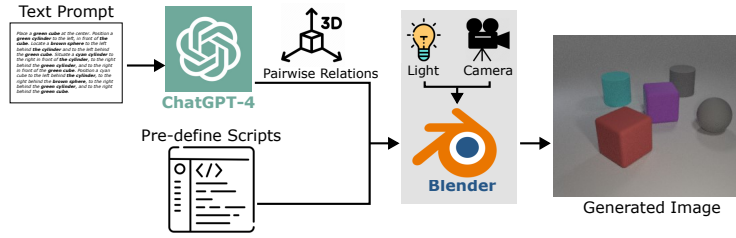

**Fig. 4:** Overview of the Experiment Setup for ChatGPT+Blender Integration.

into 3D coordinates. These coordinates are then integrated into predefined Blender scripts, leading to the generation of images that are rendered with predetermined view directions and lighting conditions. To optimize the performance of this process, we experimented with different settings of GPT prompts and selected the configuration that achieved the best results on the validation split.

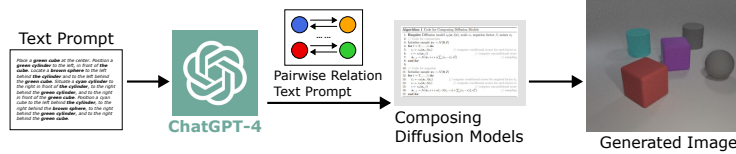

**Fig. 5:** Overview of the Experiment Setup for ChatGPT+Comp Integration.

Figure 5 presents another setting in our experiments. Due to the limitation of composing diffusion models [3]—their inability to process complex, logic-rich text prompts directly—these models require inputs to be simplified into pairwise relations. By employing ChatGPT to break down complex prompts into these simpler, executable forms, the models can generate visual content that reflects the specifications provided in the original text prompts. Similar to the above setting, to ensure the effectiveness of this approach, we tested various configurations of the text prompts with ChatGPT and adopted the method that yielded the most accurate visual representations according to our validation split.

### 3 Limitations

Figure 6 highlights certain limitations of our proposed baseline model through various failure cases. One notable issue arises with text prompts that contain variant syntax or rare vocabulary, leading to the model’s difficulty in comprehending relationships and subsequently resulting in accumulated errors. For instance, in the first row, the term “rear” is not commonly used, and the sentence structure deviates from the typical format where the verb often leads. Similarly,

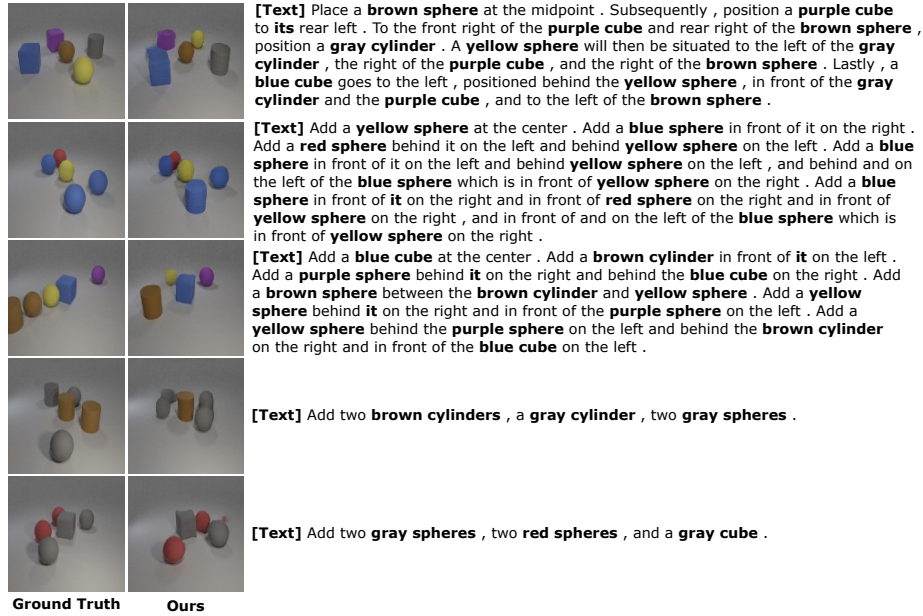

Fig. 6: Failure Cases of Our Proposed Model.

as text prompts become lengthier, the model tends to inaccurately generate entities. An example of this can be seen in row 2, where a *blue sphere*, the intended last entity, is mistakenly generated as a *blue cylinder*. This issue can be partially solved by enlarging the dataset scale or involving more input variation.

Moreover, our task encounters common challenges prevalent in the visual-language domain. In row 3, the model struggles with interpreting the concept of "between", indicating difficulty in correlating linguistic tokens with their visual spatial representations. Additionally, rows 4 and 5 exemplify the persistent challenge of aligning numerical descriptions with visual representations, a task that remains complex due to the inherent differences in two domain features. These challenges arise largely from ambiguities present in both modalities. These examples highlight the difficulties faced in integrating language understanding with visual generation, marking areas for future improvement and research.

## References

1. Bird, S., Klein, E., Loper, E.: Natural Language Processing with Python: Analyzing Text with the Natural Language Toolkit. O'Reilly Media (2009), <https://books.google.com/books?id=KGibfiiP1i4C> 4
2. Blender Foundation: Blender - a free and open source 3d creation suite. <https://www.blender.org/> (2023), accessed: 2024-02-29 3, 4
3. Liu, N., Li, S., Du, Y., Torralba, A., Tenenbaum, J.B.: Compositional visual generation with composable diffusion models. In: European Conference on Computer Vision. pp. 423–439. Springer (2022) 5

4. OpenAI: Gpt-4: Openai's generative pre-trained transformer 4. <https://openai.com/> (2023), accessed: 2024-02-29 3, 4
